# Supplementary material for: Exploring the role of Polycomb recruitment in Xist-mediated silencing of the X chromosome in ES cells
Source: bioRxiv or medRxiv preprint supplement (doi:10.1101/495739), 2018-12-13
Supplement: Supplementary file [file media-1.pdf]

## Supplementary File

### Exploring the role of Polycomb recruitment in *Xist*-mediated silencing of the X chromosome in ES cells

Aurélie Bousard, Ana Cláudia Raposo, Jan Jakub Żylicz, Christel Picard, Vanessa Borges Pires, Yanyan Qi, Laurène Syx, Howard Y. Chang, Edith Heard, Simão Teixeira da Rocha

#### Includes:

- Figure 1 - source data 1
- Figure 1 - source data 2
- Figure 2 –source data 1 (only the legend; this file is the excel format)
- Figure 4 – source data 1
- Supplementary File 1
- Supplementary File 2
- Figure 1 –figure supplement 1
- Figure 1 –figure supplement 2
- Figure 2 –figure supplement 1
- Figure 3 –figure supplement 1
- Figure 3 –figure supplement 2
- Figure 4 – figure supplement 1

| <i>Xist</i> mutant   | Clone Number | Size of deletion | Deleted region                     | % of cells with <i>Xist</i> domains | <i>Xist</i> coating | N° of experiments | Total cell counted |
|----------------------|--------------|------------------|------------------------------------|-------------------------------------|---------------------|-------------------|--------------------|
| <i>Xist</i> FL       | n.a.         | n.a.             | n.a.                               | 45 ± 6 %                            | +++++               | 3                 | 956                |
| <i>Xist</i> ΔA       | n.a.         | 917 bp           | Δ1-917                             | 53 ± 9 %                            | ++++                | 3                 | 990                |
| <i>Xist</i> ΔF+B+C   | 1            | 3,908 bp         | Δ890-4796                          | 77 ± 4 %                            | +++                 | 3                 | 811                |
|                      | 2            | 3,908 bp         | Δ890-4796                          | n.d.                                | +++                 | n.d.              | n.a.               |
| <i>Xist</i> ΔF+B     | 1            | 2,119 bp         | Δ875-2982                          | 76 ± 3 %                            | +++                 | 3                 | 869                |
|                      | 2            | 2,130 bp         | Δ862-2990                          | 87%                                 | +++                 | 1                 | 272                |
| <i>Xist</i> ΔB+C     | 1            | 2,109 bp         | Δ2,703-4810                        | 60 ± 8 %                            | +++++               | 3                 | 952                |
|                      | 2            | 2,049 bp         | Δ2,699-4744<br>(+ 45 bp insertion) | 7%                                  | +++++               | 1                 | 269                |
| <i>Xist</i> ΔB+1/2C* | 1            | 1,383 bp         | Δ2,703-4,084                       | 60 ± 3 %                            | +++++               | 3                 | 921                |
|                      | 2            | 454 bp & 810 bp  | Δ2,705-3,158 & Δ3,558-4,367        | 52%                                 | +++++               | 1                 | 298                |
| <i>Xist</i> ΔB       | 1            | 335 bp           | Δ2,707-3,041                       | 67 ± 4 %                            | +++++               | 3                 | 978                |
|                      | 2            | 337 bp           | Δ2,705-3,041                       | 44%                                 | +++++               | 1                 | 365                |
| <i>Xist</i> ΔC       | 1            | 1,716 bp         | Δ3,041-4,752                       | 71 ± 2 %                            | +++++               | 3                 | 863                |
|                      | 2            | 1,716 bp         | Δ3,041-4,752                       | 34%                                 | +++++               | 1                 | 298                |

**Figure 1 - source data 1 – Full set of *Xist*-TetOP mutants generated**

Summary table of the analysis of full set of the *Xist*-TetOP mutants generated (including the second clone per type of mutation) in terms of: deletion size, coordinates of the deleted regions (based on Ensembl *Xist* exonic sequence); number of cells with *Xist* domains (in % ± S.E.M.) and capacity of *Xist* coating (+++++ indicates *Xist* cloud signals similar to *Xist* FL; ++++ and +++ indicate *Xist* cloud signals of decreased size compared to *Xist* FL); n.d. – not done; n. a. – not applied; \* To generate *Xist* ΔB+1/2C mutants, we use a 3'end gRNA which recognized a unique region within repeat C, however, several other sequences with only 1 or 2 mismatched can be found within this repeat and were likely to be targeted, creating distinct deletions as can be seen for the two clones of this type of mutant.

| <i>Xist</i> mutant  | Clone | JARID2                       | EZH2                          | H3K27me3                      | RING1B                        | H2AK119ub                    |
|---------------------|-------|------------------------------|-------------------------------|-------------------------------|-------------------------------|------------------------------|
| <i>Xist</i> FL      | n.a.  | 88 ± 4 %<br>(4 exp, n = 275) | 85 ± 7 %<br>(3 exp, n = 242)  | 92 ± 7 %<br>(3 exp, n = 248)  | 48 ± 14 %<br>(4 exp, n = 313) | 96 ± 1 %<br>(3 exp, n = 223) |
| <i>Xist</i> ΔA      | n.a.  | 78 ± 4 %<br>(3 exp, n = 261) | 78 ± 11 %<br>(3 exp, n = 243) | 97 ± 2 %<br>(3 exp, n = 228)  | 50 ± 10 %<br>(4 exp, n = 302) | 97 ± 2 %<br>(3 exp, n = 269) |
| <i>Xist</i> ΔF+B+C  | 1     | 1 ± 1 %<br>(3 exp, n = 257)  | 1 ± 1 %<br>(3 exp, n = 232)   | 3 ± 2 %<br>(3 exp, n = 236)   | 0 ± 0 %<br>(2 exp, n = 143)   | 1 ± 0 %<br>(3 exp, n = 227)  |
|                     | 2     | n.d.                         | n.d.                          | 0%<br>(1 exp, n = 85)         | n.d.                          | 2%<br>(1 exp, n = 83)        |
| <i>Xist</i> ΔF+B    | 1     | 1 ± 1 %<br>(2 exp, n = 204)  | 2 ± 2 %<br>(2 exp, n = 180)   | 18 ± 15 %<br>(2 exp, n = 198) | 0 ± 0 %<br>(3 exp, n = 218)   | 28 ± 7 %<br>(2 exp, n = 154) |
|                     | 2     | 14%<br>(1 exp, n = 93)       | 18%<br>(1 exp, n = 180)       | 32%<br>(1 exp, n = 66)        | 0%<br>(1 exp, n = 57)         | 32%<br>(1 exp, n = 57)       |
| <i>Xist</i> ΔB+C    | 1     | 0 ± 0 %<br>(3 exp, n = 237)  | 0 ± 0 %<br>(3 exp, n = 216)   | 1 ± 0 %<br>(3 exp, n = 208)   | 0 ± 0 %<br>(4 exp, n = 292)   | 1 ± 1 %<br>(2 exp, n = 181)  |
|                     | 2     | 0%<br>(1 exp, n = 68)        | 0%<br>(1 exp, n = 63)         | 5%<br>(1 exp, n = 63)         | 0 ± 0 %<br>(2 exp, n = 98)    | 3%<br>(1 exp, n = 65)        |
| <i>Xist</i> ΔB+1/2C | 1     | 0 ± 0 %<br>(2 exp, n = 202)  | 0 ± 0 %<br>(2 exp, n = 165)   | 5 ± 0 %<br>(2 exp, n = 182)   | 0%<br>(1 exp, n = 54)         | 17 ± 2 %<br>(3 exp, n = 262) |
|                     | 2     | 1%<br>(1 exp, n = 87)        | n.d.                          | 5%<br>(1 exp, n = 63)         | 0%<br>(1 exp, n = 100)        | 14%<br>(1 exp, n = 100)      |
| <i>Xist</i> ΔB      | 1     | 6 ± 3 %<br>(3 exp, n = 265)  | 18 ± 5 %<br>(3 exp, n = 270)  | 49 ± 7 %<br>(3 exp, n = 240)  | 1 ± 1 %<br>(3 exp, n = 217)   | 61 ± 8 %<br>(3 exp, n = 257) |
|                     | 2     | n.d.                         | n.d.                          | 38%<br>(1 exp, n = 90)        | n.d.                          | 63 ± 16 %<br>(2 exp, n = 93) |
| <i>Xist</i> ΔC      | 1     | 89 ± 4 %<br>(3 exp, n = 255) | 81 ± 9%<br>(2 exp, n = 172)   | 78 ± 2 %<br>(3 exp, n = 195)  | 37 ± 4 %<br>(3 exp, n = 240)  | 99 ± 0 %<br>(3 exp, n = 288) |
|                     | 2     | 89%<br>(1 exp, n = 72)       | n.d.                          | 65%<br>(1 exp, n = 63)        | n.d.                          | 97%<br>(1 exp, n = 72)       |

**Figure 1 - source data 2 - Summary table of IF/*Xist* RNA FISH experiments in the full set of *Xist*-TetOP mutants generated**

The table displays the percentage (± S.E.M.) of *Xist*-coated chromosomes exhibiting enrichment of the PcG proteins (JARID2, EZH2 and RING1B) and histone marks (H3K27me3 and H2AK119ub); a minimum of 50 *Xist*-coated chromosomes were counted per experiment (exp); n – number of cells counted in at least one or more biological replicates; n.a. – not applied; n.d. – not done.

**Figure 2 - source data 1 – Full list of ChIRP-MS peptide counts for *Xist* FL (noDOX and DOX) and *Xist*  $\Delta$ B+C (DOX) – supplementary excel file**

Sheet 1 – Selection of peptide counts for the 81 *Xist* hits [according to (Chu et al., 2015)] found in *Xist* FL and *Xist*  $\Delta$ B+C interactome (with a minimum of 2.5 DOX/noDOX fold-change in *Xist* FL or *Xist*  $\Delta$ B+C; Weakly annotated protein isoforms with an Annotation score in UniprotKB < 3 (out of 5) were excluded.

Sheet 2 – Filtered list of total number of peptides counts for in *Xist* FL (noDOX and DOX) and *Xist*  $\Delta$ B+C; In this list, only peptides with a minimum of 2.5 DOX/noDOX fold-change in *Xist* FL were selected; Weakly annotated protein isoforms with an Annotation score in UniprotKB < 3 (out of 5) were excluded; this was the case of two poorly annotated isoforms of hnRNPK: tr|Q3TL71, less bound to *Xist*  $\Delta$ B+C and tr|Q3U6X2, equally bound to *Xist* FL and  $\Delta$ B+C.

Sheet 3 – Total number of peptide counts in *Xist* FL (noDOX and DOX) and *Xist*  $\Delta$ B+C (DOX).

| <i>Xist</i> mutant     | Clone Number | <i>Lamp2</i> (D2)            | <i>Pgk1</i> (D2)             | <i>Pgk1</i> (D4)             | <i>Rnf12</i> (D4)            |
|------------------------|--------------|------------------------------|------------------------------|------------------------------|------------------------------|
| <i>Xist</i> FL (noDOX) | n.a.         | 58 ± 9%<br>(2 exp, n = 245)  | 53 ± 7%<br>(3 exp, n = 308)  | 68 ± 8%<br>(2 exp, n = 353)  | 73%<br>(1 exp, n = 106)      |
| <i>Xist</i> FL         | n.a.         | 10 ± 1 %<br>(3 exp, n = 345) | 9 ± 3%<br>(3 exp, n = 375)   | 11 ± 2 %<br>(4 exp, n = 363) | 19 ± 9 %<br>(2 exp, n = 211) |
| <i>Xist</i> ΔA         | n.a.         | 75 ± 2 %<br>(3 exp, n = 344) | 68 ± 6%<br>(3 exp, n = 352)  | 64 ± 7 %<br>(3 exp, n = 332) | 85 ± 5 %<br>(2 exp, n = 228) |
| <i>Xist</i> ΔF+B+C     | 1            | 21 ± 1 %<br>(3 exp, n = 351) | 15 ± 1%<br>(2 exp, n = 246)  | 14 ± 2 %<br>(3 exp, n = 353) | n.d.                         |
|                        | 2            | 10%<br>(1 exp, n = 81)       | n.d.                         | n.d.                         | n.d.                         |
| <i>Xist</i> ΔF+B       | 1            | 5%<br>(1 exp, n = 107)       | 12 ± 2 %<br>(2 exp, n = 216) | 21 ± 8 %<br>(3 exp, n = 327) | 23 ± 4 %<br>(2 exp, n = 210) |
|                        | 2            | n.d.                         | n.d.                         | 9%<br>(1 exp, n = 111)       | 12%<br>(1 exp, n = 105)      |
| <i>Xist</i> ΔB+C       | 1            | 17 ± 1 %<br>(3 exp, n = 331) | 11 ± 1 %<br>(3 exp, n = 367) | 17 ± 4 %<br>(4 exp, n = 377) | 17%<br>(1 exp, n = 97)       |
|                        | 2            | 20%<br>(1 exp, n = 66)       | 16%<br>(1 exp, n = 64)       | n.d.                         | n.d.                         |
| <i>Xist</i> ΔB+1/2C    | 1            | 18%<br>(1 exp, n = 99)       | 11 ± 2%<br>(2 exp, n = 260)  | 19 ± 1 %<br>(2 exp, n = 246) | 5%<br>(1 exp, n = 111)       |
|                        | 2            | n.d.                         | n.d.                         | 6%<br>(1 exp, n = 112)       | n.d.                         |
| <i>Xist</i> ΔB         | 1            | 13 ± 1%<br>(3 exp, n = 330)  | 11 ± 1%<br>(2 exp, n = 220)  | 14 ± 1 %<br>(2 exp, n = 205) | n.d.                         |
|                        | 2            | n.d.                         | n.d.                         | 23%<br>(1 exp, n = 93)       | n.d.                         |
| <i>Xist</i> ΔC         | 1            | 8 ± 2%<br>(3 exp, n = 292)   | 5 ± 2 %<br>(2 exp, n = 198)  | 5 ± 1 %<br>(2 exp, n = 327)  | n.d.                         |
|                        | 2            | n.d.                         | 0%<br>(1 exp, n = 59)        | n.d.                         | n.d.                         |

**Figure 4 - source data 1 - Summary table of combined *Xist* with X-linked nascent-transcript RNA FISH for *Pgk1*, *Lamp2* and *Rnf12* in the full set of *Xist*-TetOP mutants**

The table displays the percentage (± S.E.M.) of *Xist*-coated chromosomes exhibiting an active *Pgk1* (at D2 and D4), *Lamp2* (at D2) and *Rnf12* gene (at D4); a minimum of 50 *Xist*-coated chromosomes were counted per experiment (exp); for *Xist* FL noDOX a minimum of 100 cells (which do not have *Xist*-coated chromosome) were counted; n – number of cells counted in at least one or more biological replicate (exp); n.d. – not done; n.a. – not applied.

| <i>Xist</i> mutants         | 5'end /3'end sgRNAs                            | Primers to confirm deletion (F/R)              | Primers to confirm loss of WT sequence (F/R)    |
|-----------------------------|------------------------------------------------|------------------------------------------------|-------------------------------------------------|
| <i>Xist</i> $\Delta$ F+B+C  | TCACGCAGAAGCCATAATGG/<br>CTTGAGAGATGATACCTCCA  | CTGCTGATCGTTTGGTGCTG/<br>CAGACCTGTGTTTGCCCTT   | CTGCTGATCGTTTGGTGCTG/<br>ATCAAGGCGAATCCCGCAAC   |
| <i>Xist</i> $\Delta$ F+B    | TCACGCAGAAGCCATAATGG/<br>AGGGCTGGACTGGATTGGGT  | TGGTGCTGTGTGAGTGAACC/<br>TTAGCACTGAATCAATGAAGA | CTGCTGATCGTTTGGTGCTG/<br>ATCAAGGCGAATCCCGCAAC   |
| <i>Xist</i> $\Delta$ B+C    | TATAACAGTAAGTCTGATAG/<br>GTGTATCTTGATTAACATGA  | ATGACTGGATGTCAGGAGTA/<br>CAGACCTGTGTTTGCCCTT   | ATGACTGGATGTCAGGAGTA/<br>CTGAGTCTTGAGGAGAATCT   |
| <i>Xist</i> $\Delta$ B+1/2C | TATAACAGTAAGTCTGATAG/<br>CATACTGACTTCTAGAGTCA* | ATGACTGGATGTCAGGAGTA/<br>CAGACCTGTGTTTGCCCTT   | ATGACTGGATGTCAGGAGTA/<br>CTGAGTCTTGAGGAGAATCT   |
| <i>Xist</i> $\Delta$ B      | TATAACAGTAAGTCTGATAG/<br>CTCTAAGTAGAAGTGGGCTT  | ATGACTGGATGTCAGGAGTA/<br>TTAGCACTGAATCAATGAAGA | ATGACTGGATGTCAGGAGTA/<br>CTGAGTCTTGAGGAGAATCT   |
| <i>Xist</i> $\Delta$ C      | CTCTAAGTAGAAGTGGGCTT/<br>GTGTATCTTGATTAACATGA  | CCAGGCCAGATACTTTCAG/<br>CAGACCTGTGTTTGCCCTT    | TCCATGGACAAGTAAACAAAGAA/<br>TGTTTGCCCTTTGCTAAAT |

**Supplementary File 1 – List of gRNA sequences and primers used for *CRISPR/Cas9* editing of the different *Xist*-TetOP mutants**

Primer sequences to confirm deletion and loss of wild-type (WT) allele are displayed for each *Xist* mutant; \* highlights for the fact that the 3'end gRNA used to generate  $\Delta$ B+1/2C was designed to a unique region within the repeat C, but several sequences with only 1 or 2 mismatched can be found within this repeat and are likely to be targeted to generate different types of  $\Delta$ B+1/2C mutants.

| <b>RT-PCR analysis</b>      | Sequences (F/R)                                  |
|-----------------------------|--------------------------------------------------|
| <i>Xist</i> exon 1-exon 3   | GCTGGTTCGTCTATCTTGTGGG / CAGAGTAGCGAGGACTTGAAGAG |
| <i>Xist</i> before repeat B | ATGACTGGATGTCAGGAGTA / CTGAGTCTTGAGGAGAATCT      |
| <i>Xist</i> before repeat C | TCCATGGACAAGTAAACAAAGAA / TGTTTGCCCTTTGCTAAAT    |
| <i>Gapdh</i>                | AACTTTGGCATTGTGGAAGG / ACACATTGGGGGTAGGAACA      |

**Supplementary File 2- Primer sequences for RT-PCR analysis of *Xist* mutants (used in Figure 1 – supplement figure 1B)**

**Figure 1 - figure supplement 1 – Characterization of the novel *Xist*-TetOP mutants**

- A. Deletion mapping by Sanger sequencing and expression analysis across deleted region in the novel *Xist*  $\Delta F+B+C$ ,  $\Delta B+F$ ,  $\Delta B+C$ ,  $\Delta B+1/2C$ ,  $\Delta B$  and  $\Delta C$  mutants (this analysis is for clone 1 of each mutant type); red arrows indicate forward primer and green arrows represent reverse primers; the primer of the left is the sequenced primer for each mutant; B means PCR blank.
- B. RT-PCR analysis of the splicing pattern and expression across the repeat B and C regions of the different *Xist*-TetOP mutants; Primer pairs indicated in the scheme in green (see Materials and Methods); B means PCR blank.
- C. *Xist* RNA FISH analysis upon D4 of differentiation in the presence of DOX (also noDOX for *Xist* FL) in the *Xist*  $\Delta F+B+C$ ,  $\Delta B+F$ ,  $\Delta B+C$ ,  $\Delta B+1/2C$ ,  $\Delta B$  and  $\Delta C$  mutants (this analysis is for clone 1 of each mutant type); values represent the %  $\pm$  standard error (S.E.M.) of cells with a *Xist*-coated chromosome (at least 3 biological replicates with a minimum of 250 cells counted per replicate); Scale bar: 10  $\mu$ m.

**Figure 1 - figure supplement 2 – Recruitment of a PRC2 member (EZH2), a PRC2 co-factor (JARID2) and PRC1 member (RING1B) in the different *Xist*-TetOP mutants**

- A. Representative images of combined IF for JARID2 (green) with RNA FISH for *Xist* (red) in *Xist*-TetOP lines (for clone 1 of each mutant type) upon D2 in the presence of DOX; DAPI in blue.
- B. Representative images of combined IF for RING1B (green) with RNA FISH for *Xist* (red) in *Xist*-TetOP lines (for clone 1 of each mutant type) upon D2 in the presence of DOX; DAPI in blue; Scale bar: 10  $\mu$ m.
- C. Graph representing the % of *Xist*-coated chromosomes enriched for JARID2, EZH2 and RING1B in the different *Xist*-TetOP mutants (for clone 1 of each mutant type) from 2-to-4 independent experiments. A minimum of 50 *Xist*-coated chromosomes were counted per experiment. Significant differences from unpaired Student's *t*-test, comparing mutants to *Xist* FL are indicated as \* p-value < 0.05.

**Figure 2 - figure supplement 1 – Quality check of ChIRP procedure in *Xist* FL and *Xist*  $\Delta B+C$  cells**



- A. RT-qPCR with three primer pairs along *Xist* to evaluate RNA retrieval after ChIRP procedure for *Xist* FL (in noDOX and DOX conditions) and *Xist*  $\Delta$ B+C (DOX) at D3.
- B. Table showing the percentage of cells exhibiting a *Xist*-coated X chromosome for *Xist* FL (both noDOX and DOX) and *Xist*  $\Delta$ B+C (DOX) as determined by *Xist* RNA FISH used for ChIRP-MS; A minimum of 500 cells were counted.
- C. Blot visualized with Coomassie blue staining showing the band pattern of proteins displayed by *Xist* FL (both noDOX and DOX) and *Xist*  $\Delta$ B+C (DOX) after ChIRP.

**Figure 3 - figure supplement 1 – nChIP-seq confirms residual enrichment of H3K27me3 and H2AK119ub marks at X-linked active genes**

- A. Normalized signal of H3K27me3 and H2AK119ub around *HoxC* cluster; shown is the signal of each sample around these cluster, normalized by the size of the library.
- B. Barplot representing percentages of H3K27me3 and H2AK119ub reads mapping on X chromosome (chrX) in each sample.
- C. Violin plots quantifying H3K27me3 and H2AK119ub enrichment over intergenic regions, active promoters and active gene bodies on X chromosome and on autosomes in *Xist* FL and *Xist*  $\Delta$ B+C cell lines upon DOX induction at day of differentiation; Shown is the calculated log<sub>2</sub> fold change of DOX vs noDOX conditions; n = indicates the number of genes analyzed; p-values were calculated using unilateral Wilcoxon test, comparing X chromosome (chrX) and autosomal enrichment of PcG marks for each genomic region.

**Figure 3 - figure supplement 2 – Normalization of H3K27me3 and H2AK119ub enrichment over the X chromosome in *Xist* FL and *Xist*  $\Delta$ B+C based on *Xist* induction levels**

- A. Table showing the percentage of cells exhibiting a *Xist*-coated X chromosome (chrX) for the different duplicates of *Xist* FL and *Xist*  $\Delta$ B+C in DOX and noDOX conditions as determined by *Xist* RNA FISH; A minimum of 500 cells were counted to calculate the percentage of cells with a *Xist*-coated chrX.
- B. Violin plots quantifying H3K27me3 and H2AK119ub enrichment over intergenic regions, active promoters and gene bodies on chrX in *Xist* FL and *Xist*  $\Delta$ B+C upon DOX induction at day 2 of differentiation after normalization for the percentage of

cells with *Xist*-coated chromosomes. Shown is the log<sub>2</sub> fold change of DOX vs noDOX conditions; n = indicates the number of genes analyzed; p-values were calculated using paired Wilcoxon test, comparing *Xist* FL and *Xist* ΔB+C cell lines.

**Figure 4 - figure supplement 1 –Assessment of transcriptional changes by RNA-seq in *Xist* FL, *Xist* ΔA and *Xist* ΔB+C induced cells**

- A. Genome browsers plots showing RNA-seq reads on *Xist/Tsix* genes for *Xist* FL, *Xist* ΔA and *Xist* ΔB+C mutants in DOX and noDOX conditions at D2 of differentiation; yellow boxes display the deleted regions in both *Xist* ΔA and *Xist* ΔB+C.
- B. Barplot representing percentages of RNA-seq reads mapping on X-chromosome (chrX) in each sample.
- C. Table showing the percentage of cells exhibiting an *Xist*-coated chrX for the different duplicates of *Xist* FL, *Xist* ΔA and *Xist* ΔB+C in DOX and noDOX conditions as determined by *Xist* RNA FISH; at least 500 cells were counted to estimate the percentage of cells with a *Xist*-coated chrX.
- D. Violin plots displaying the average log<sub>2</sub>(fold-change) in gene expression between DOX and noDOX conditions on chrX and autosomes in *Xist* FL, *Xist* ΔA and *Xist* ΔB+C at D2 after normalization for the percentage of cells with a *Xist*-coated chrX; n = indicates the number of genes analyzed; p-values for chrX were calculated using paired Wilcoxon test; n = indicates the number of genes analyzed.
- E. Plots displays the comparison of log<sub>2</sub>(fold-change) in X-linked gene silencing upon DOX induction between *Xist* FL and *Xist* ΔB+C at D2 of differentiation; Limma *t*-test did not find any gene differentially expressed between *Xist* FL and *Xist* ΔB+C.
- F. Boxplots displaying the normalized read enrichment at promoters for H3K27me<sub>3</sub> and H2AK119ub upon DOX induction for distinct categories of X-linked genes with different degrees of gene silencing between DOX and noDOX conditions in both *Xist* FL and *Xist* ΔB+C at D2; p-values were calculated using Wilcoxon test; numbers inside the boxplots indicate the number of genes analyzed.
- G. Boxplots displaying H3K27me<sub>3</sub> and H2AK119ub normalized enrichment levels at promoters upon induction in two categories of X-linked genes: with no or little accumulation versus with accumulation of these PcG marks in induced *Xist* ΔB+C cells; p-values were calculated using Wilcoxon test; n = indicates the number of genes analyzed

H. CpG content in promoters of X-linked genes with no or little accumulation versus with accumulation of PcG marks in induced *Xist*  $\Delta$ B+C cells; p-values were calculated using Wilcoxon test; Numbers inside the boxplots indicate the number of genes analyzed.

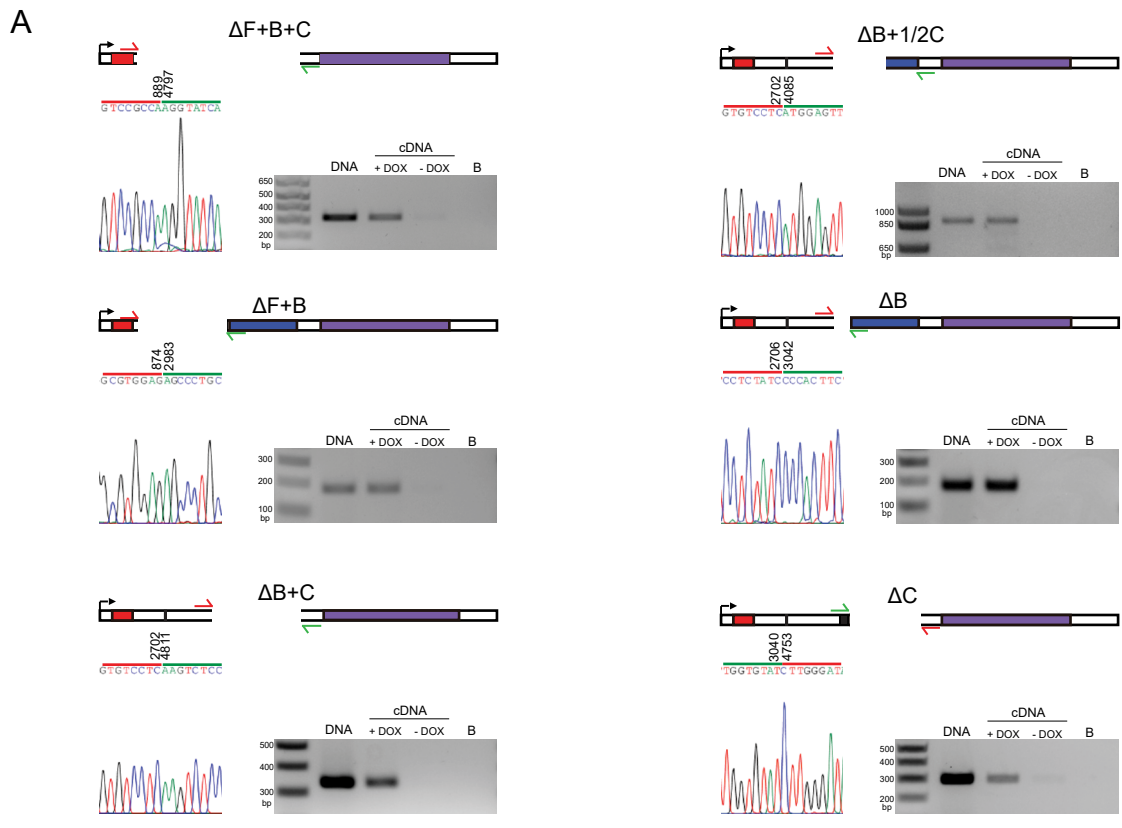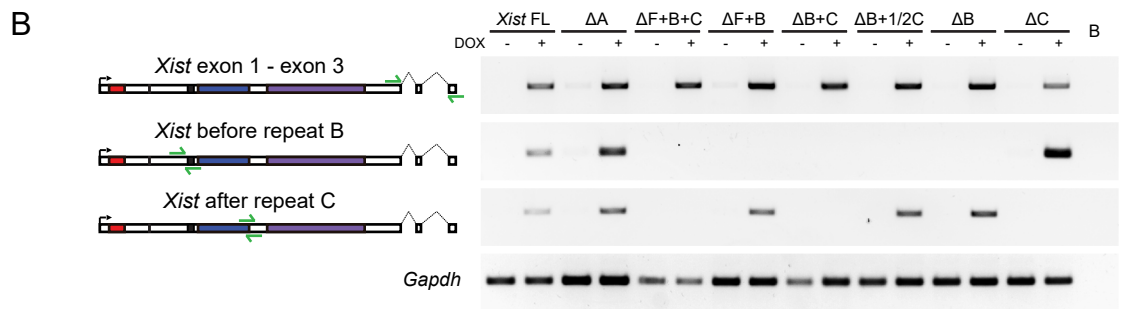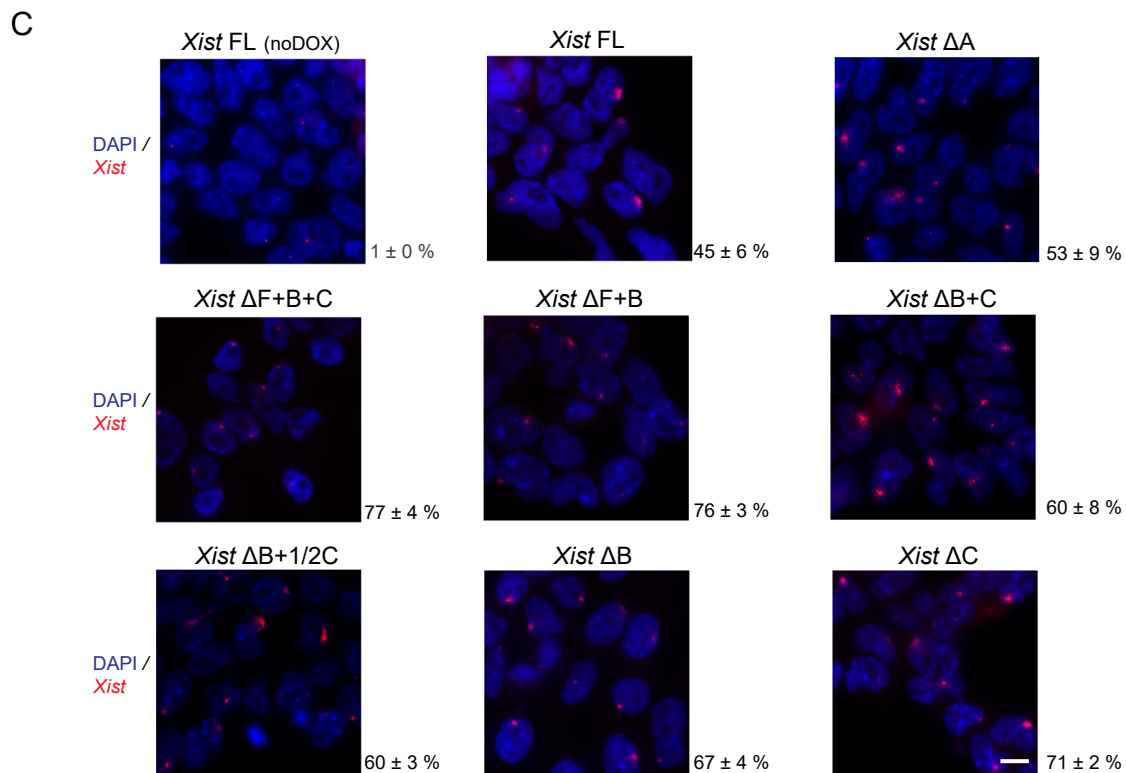

Figure 1 - figure supplement 1

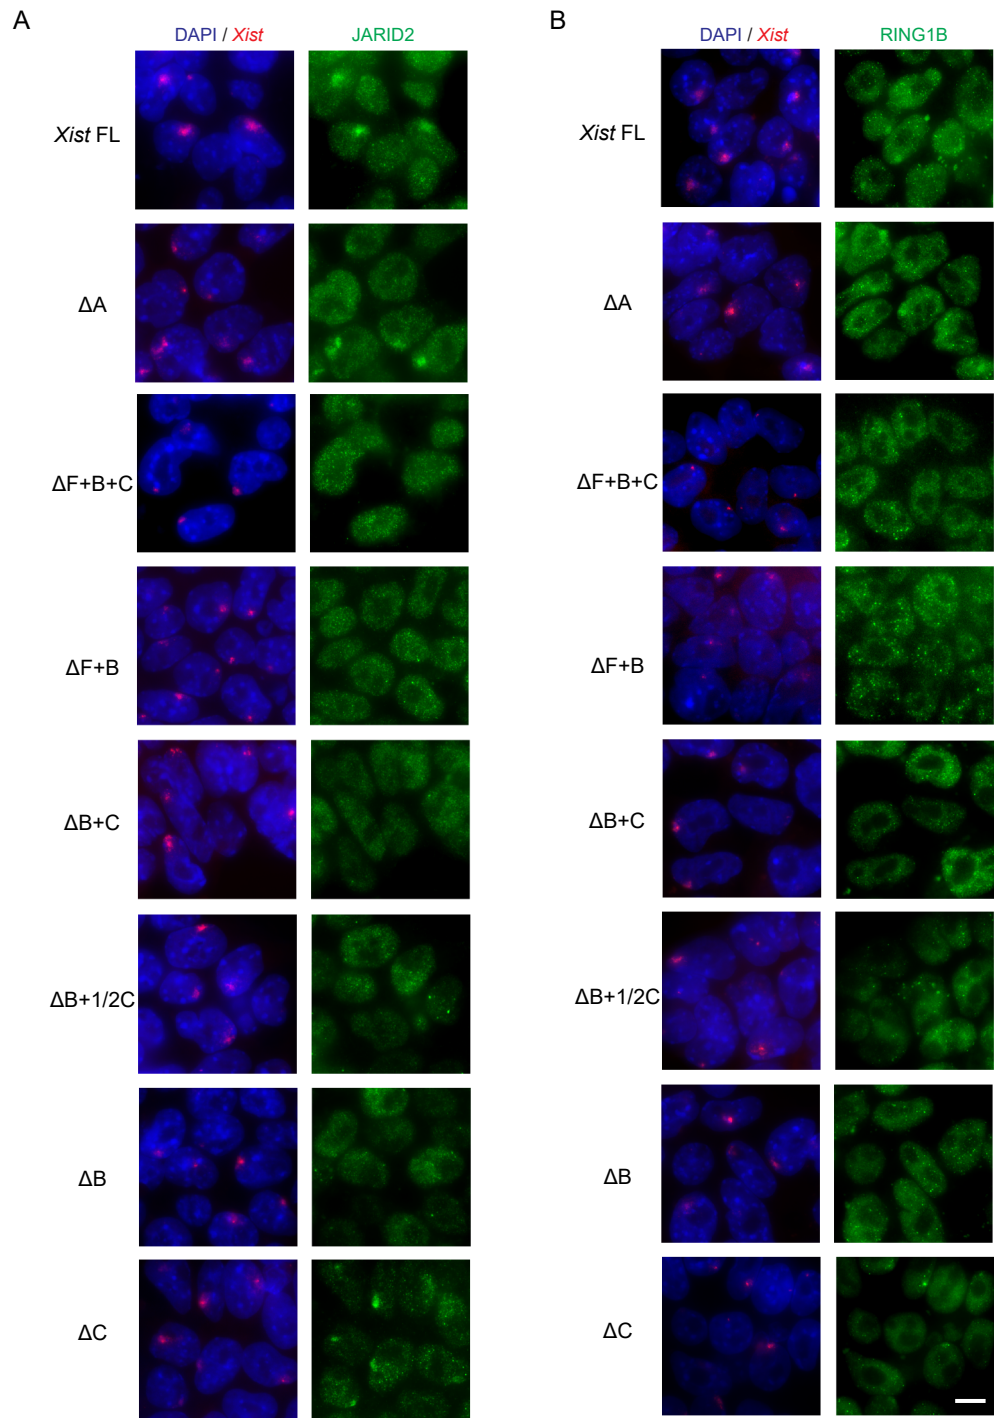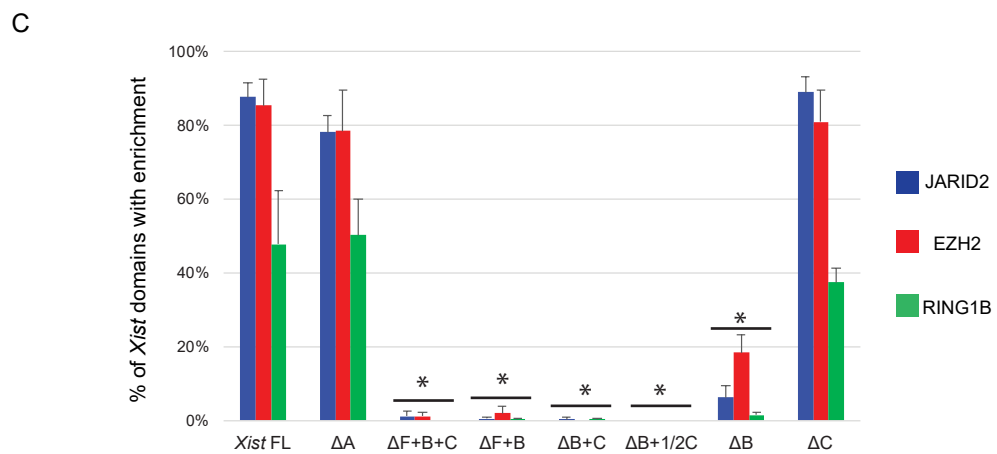

Figure 1 - figure supplement 2

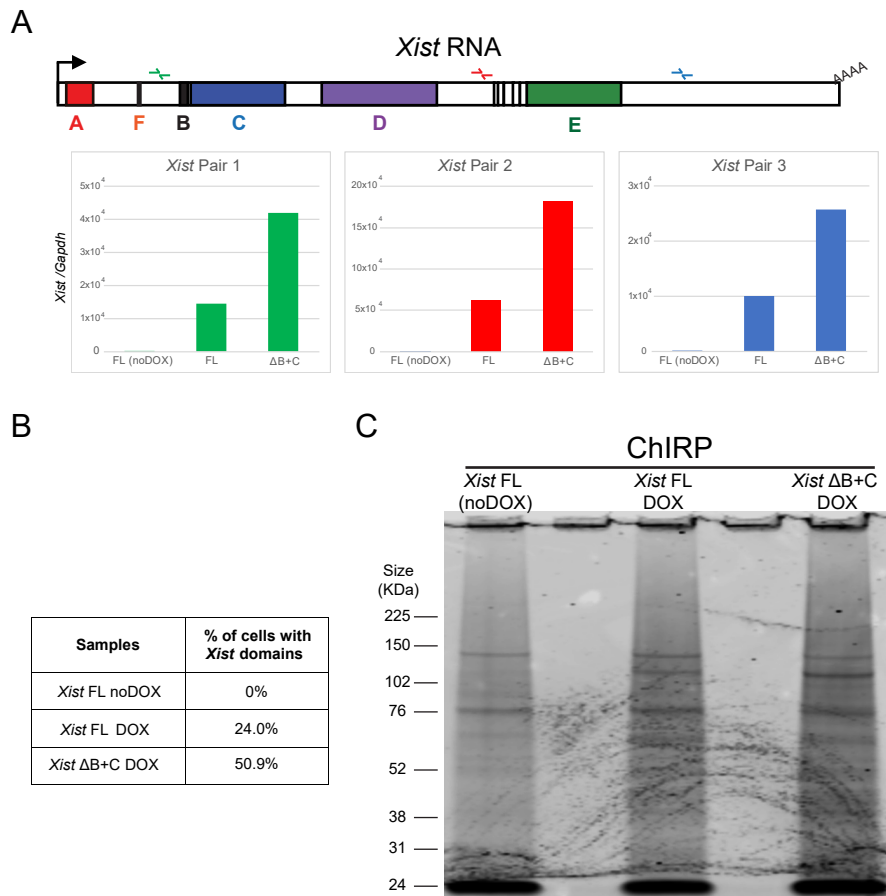

Figure 2 - figure supplement 1

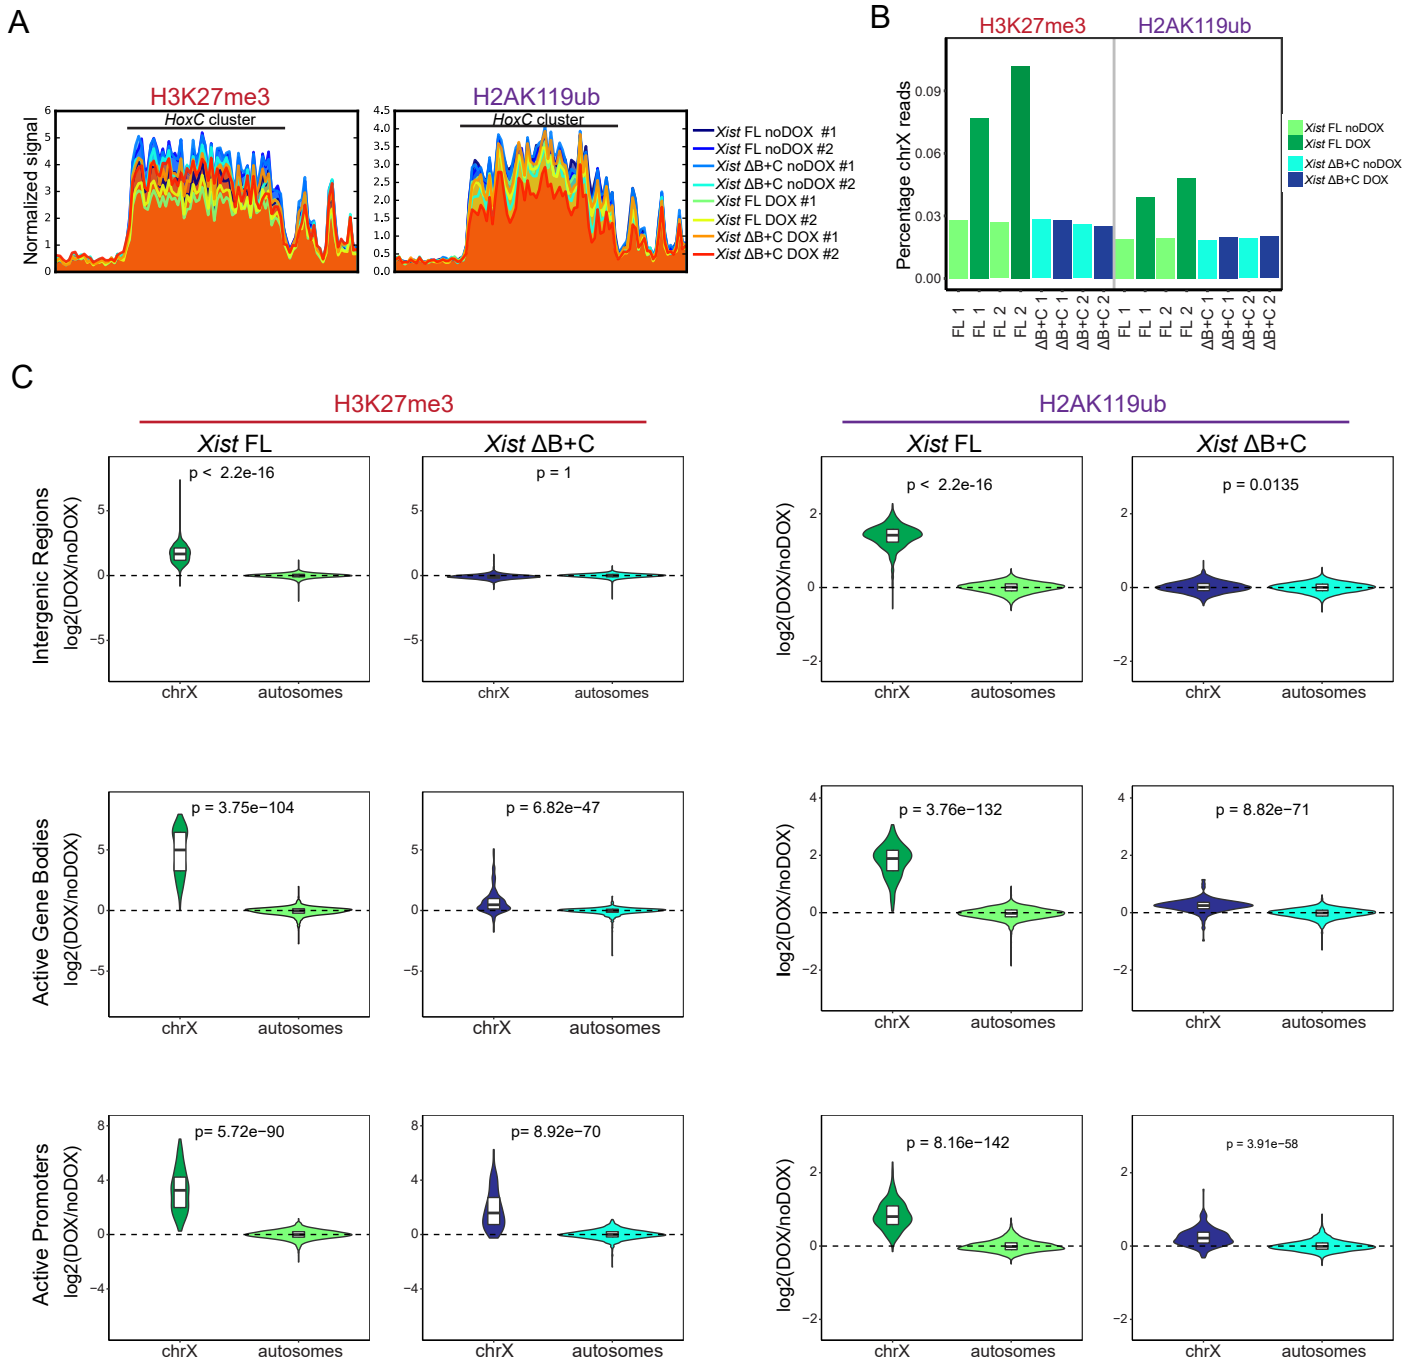

Figure 3 - figure supplement 1

A

| Samples                   | % of cells with <i>Xist</i> domains |
|---------------------------|-------------------------------------|
| <i>Xist</i> FL noDOX #1   | 0%                                  |
| <i>Xist</i> FL noDOX #2   | 0%                                  |
| <i>Xist</i> FL DOX #1     | 46.6%                               |
| <i>Xist</i> FL DOX #2     | 59.6%                               |
| <i>Xist</i> ΔB+C noDOX #1 | 0%                                  |
| <i>Xist</i> ΔB+C noDOX #2 | 0%                                  |
| <i>Xist</i> ΔB+C DOX #1   | 66.3%                               |
| <i>Xist</i> ΔB+C DOX #2   | 56.3%                               |

B

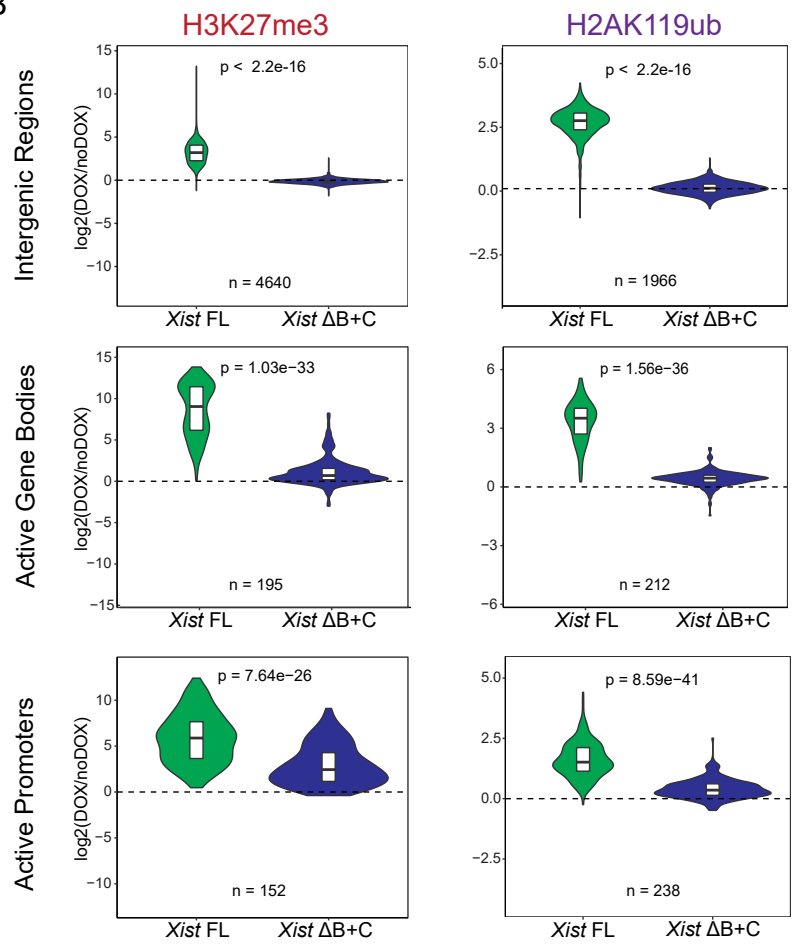

Figure 3 - figure supplement 2



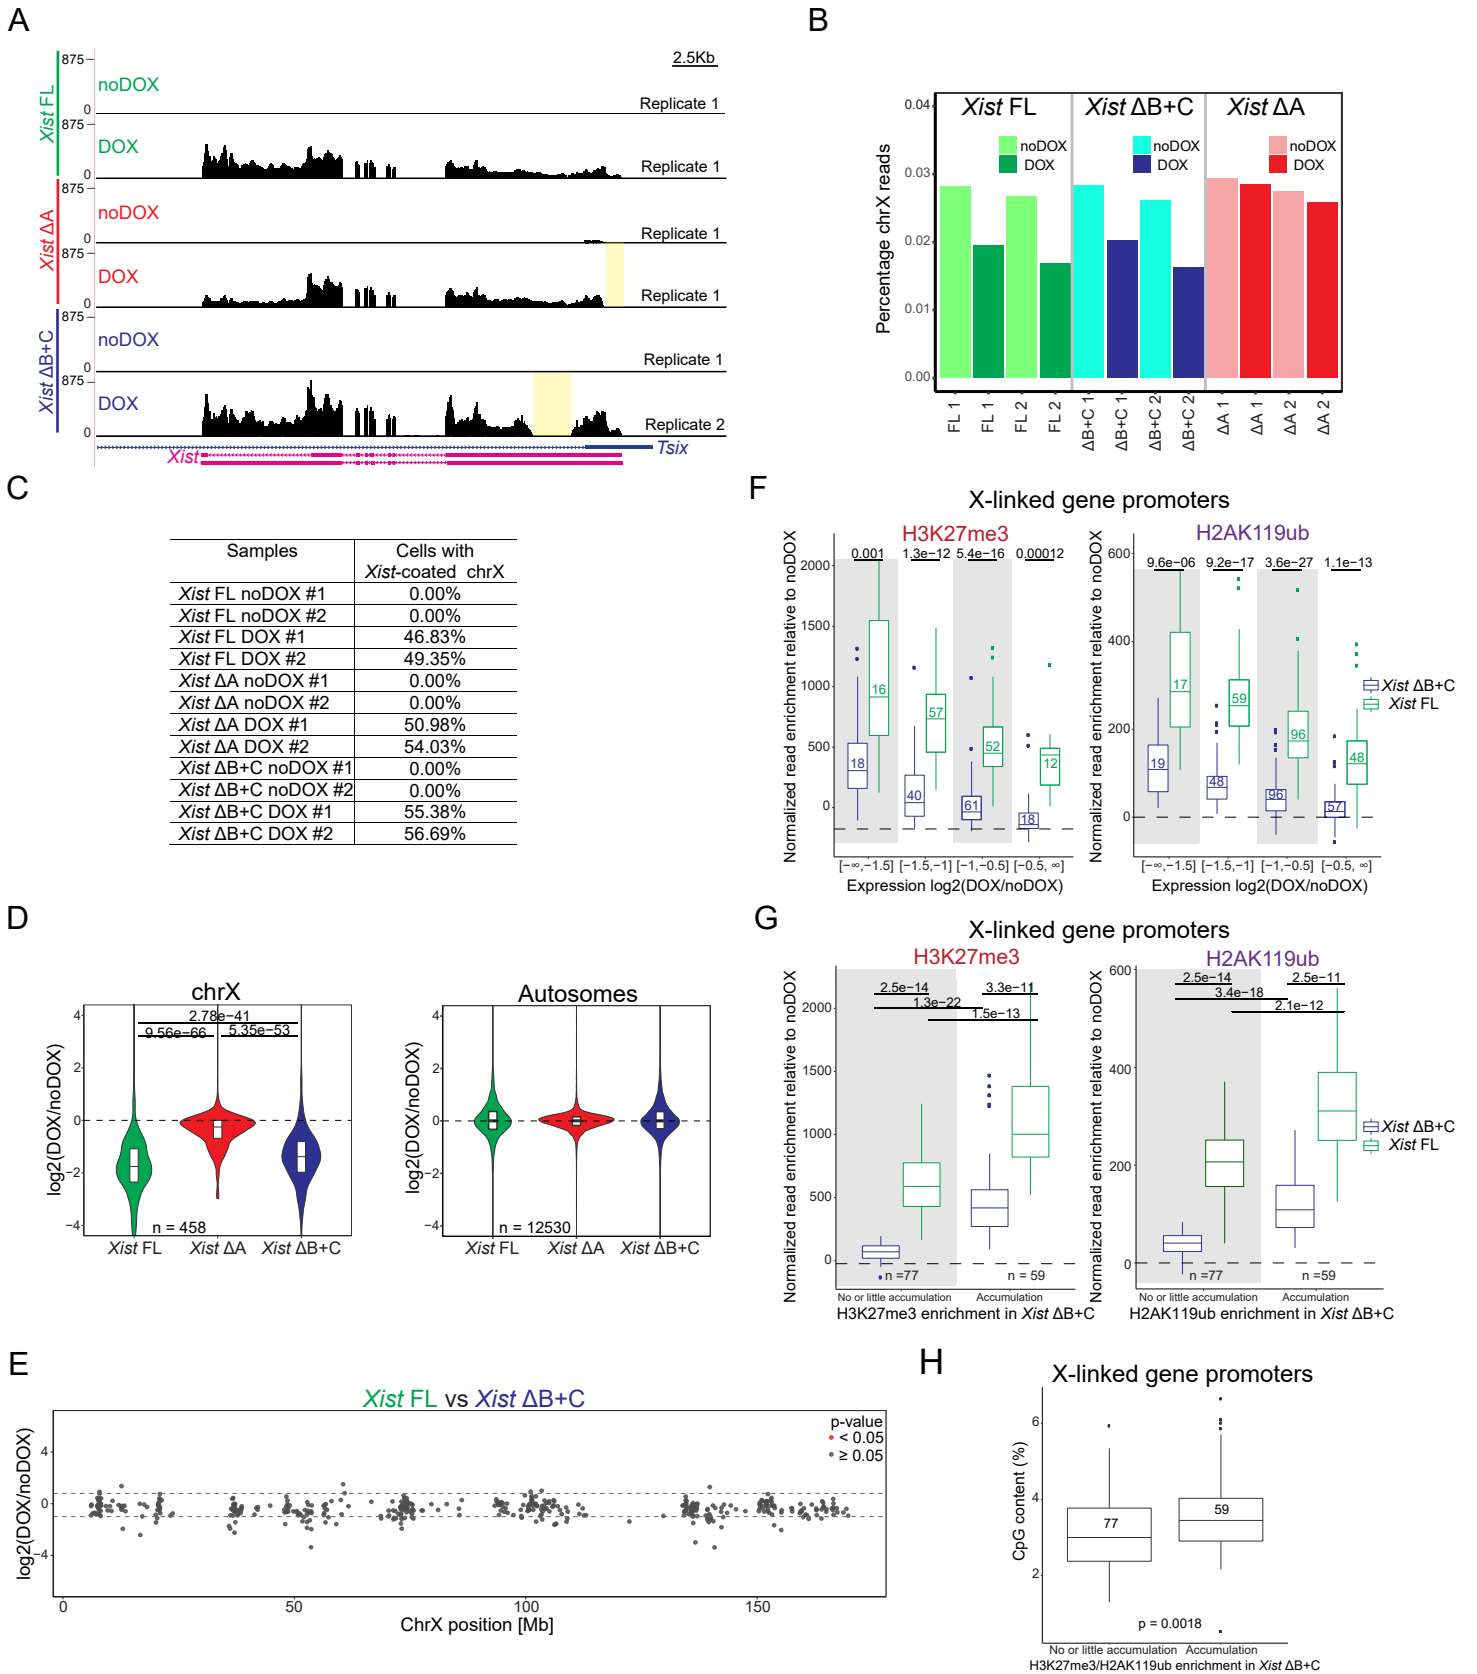

Figure 4 - figure supplement 1
